# Supplementary material for: Fulleranes produced via efficient polyamine hydrogenations of [60]fullerene, [70]fullerene and giant fullerenes
Source: Royal Society of Chemistry journal article supplement (doi:10.1039/b709354c), 2007-01-01
Supplement: b709354c.pdf [file b709354c.pdf]

# Fulleranes produced via efficient polyamine hydrogenations of [60]fullerene, [70]fullerene and giant fullerenes

Jeremy Kintigh, Jonathan B. Briggs,  
Kristine Letourneau and Glen P. Miller\*

Department of Chemistry  
and Materials Science Program  
University of New Hampshire  
Durham, NH 03824  
glen.miller@unh.edu

DET = diethylenetriamine

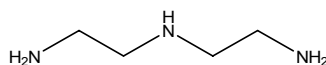

TEP = tetraethylenepentamine

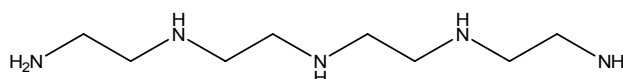

PEH = pentaethylenehexamine

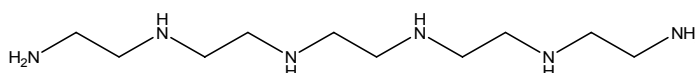

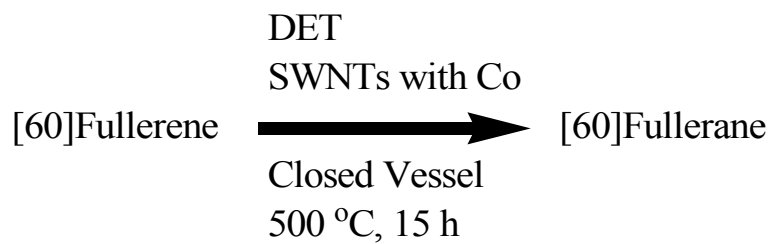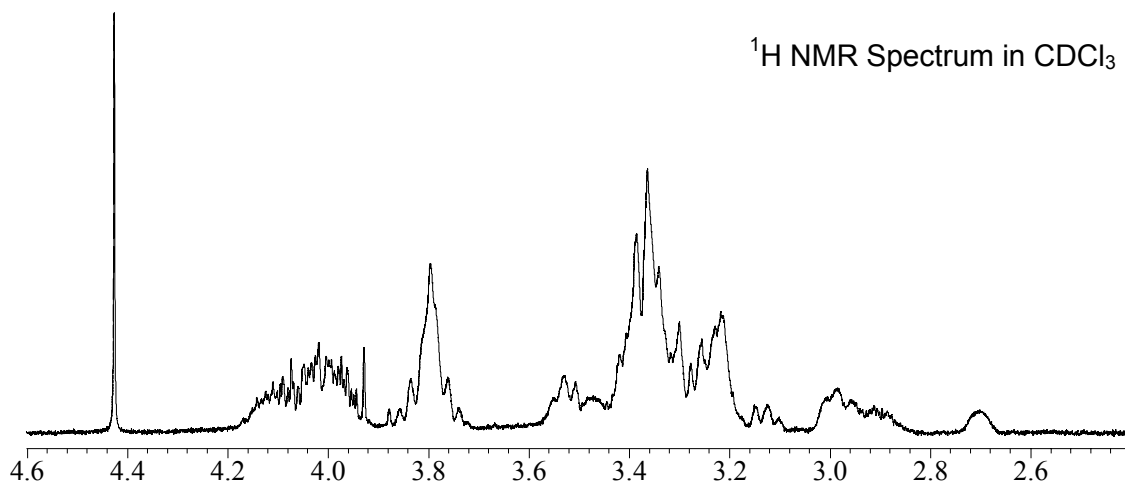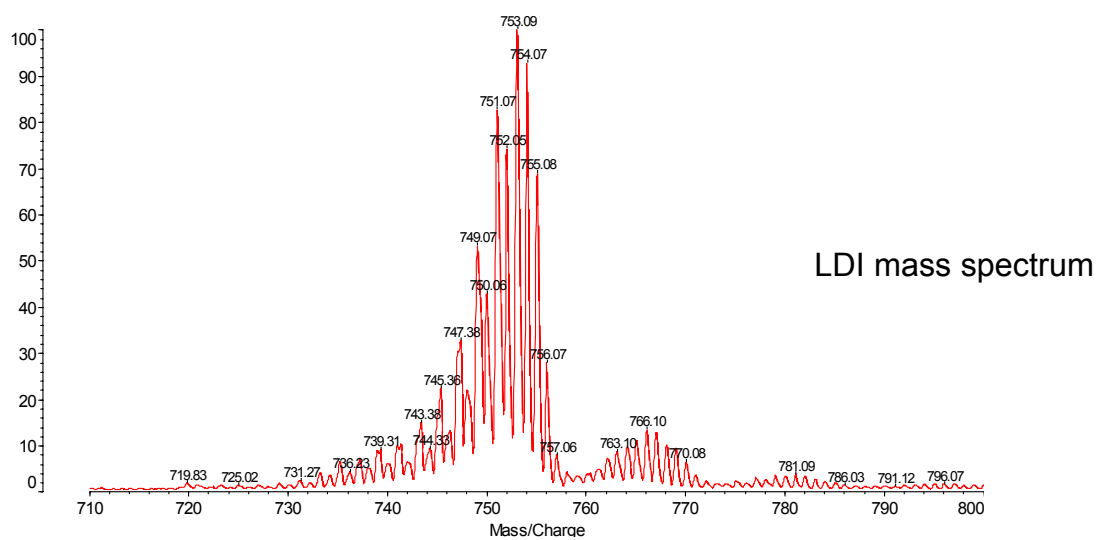

Jeremy Kintigh, Jonathan B. Briggs, Kristine Letourneau, and Glen P. Miller\*  
 Department of Chemistry and Materials Science Program-- University of New Hampshire

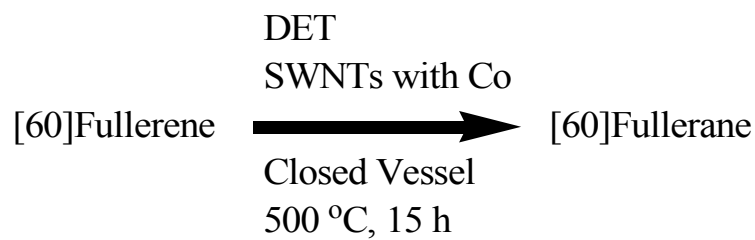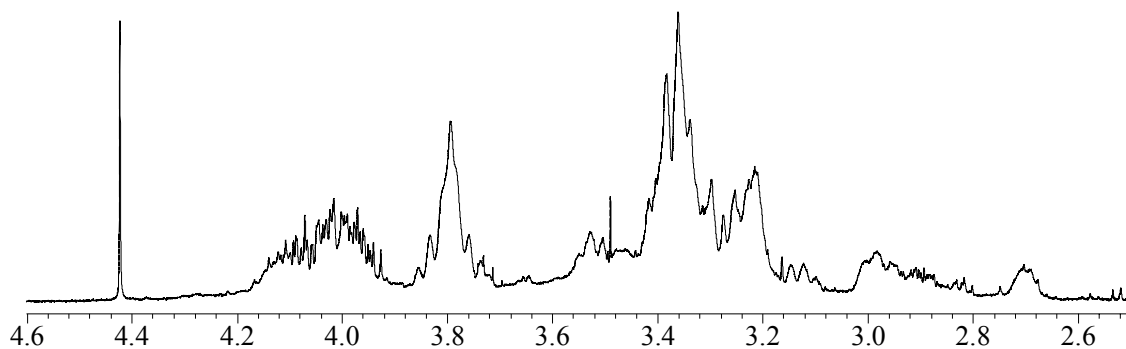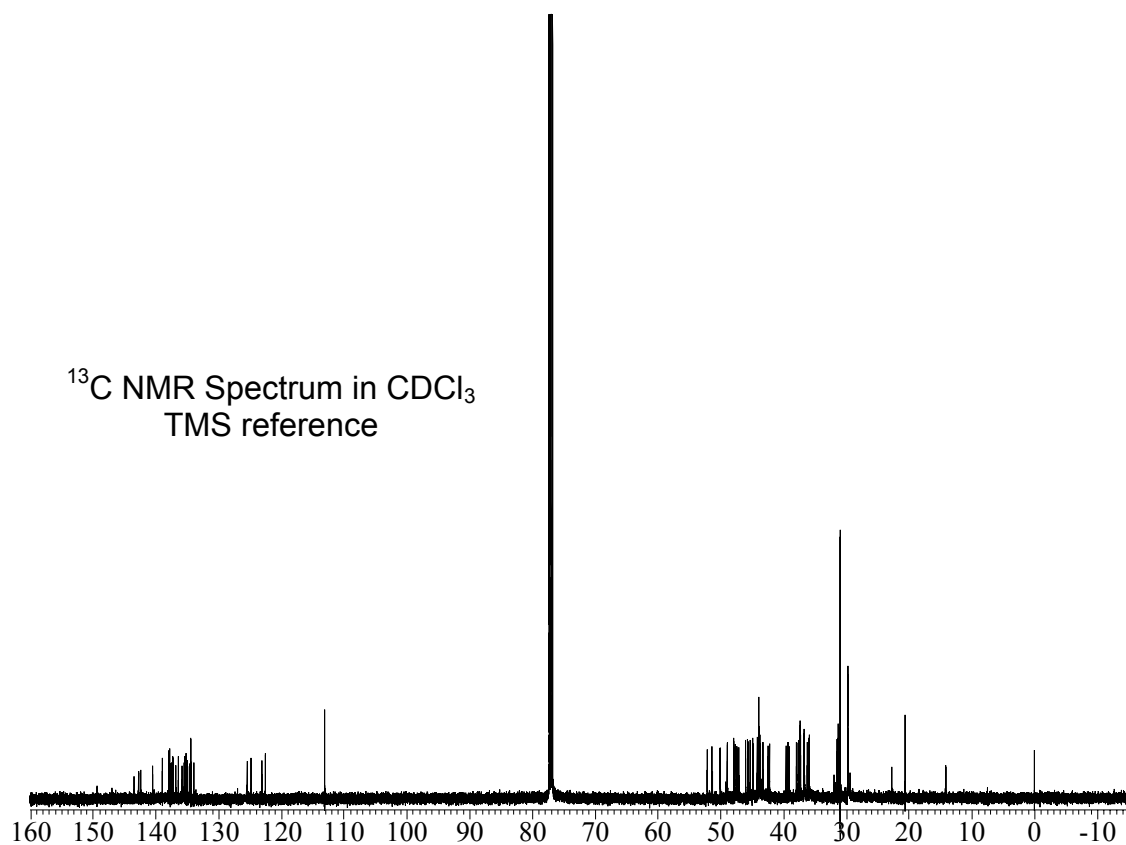

Jeremy Kintigh, Jonathan B. Briggs, Kristine Letourneua, and Glen P. Miller\*  
Department of Chemistry and Materials Science Program-- University of New Hampshire

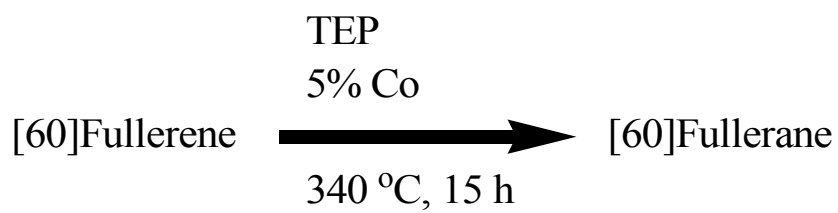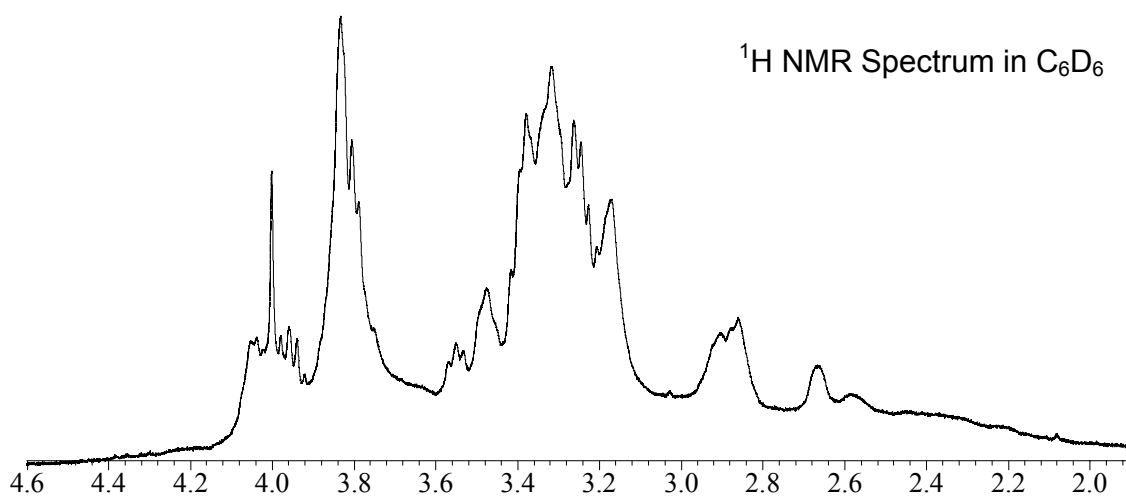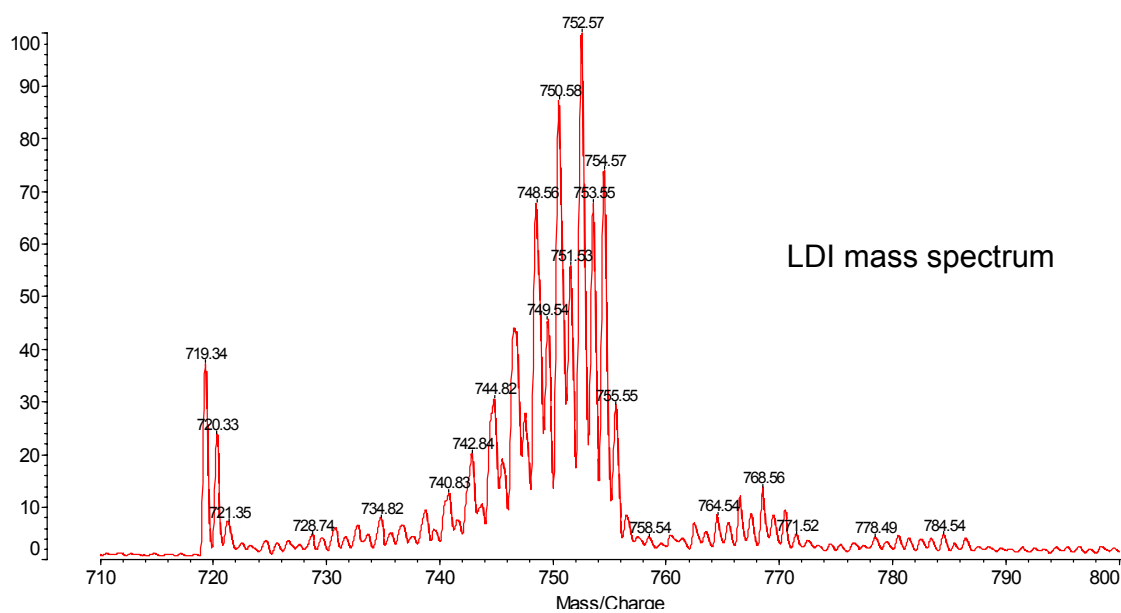

Jeremy Kintigh, Jonathan B. Briggs, Kristine Letourneau, and Glen P. Miller\*  
 Department of Chemistry and Materials Science Program-- University of New Hampshire

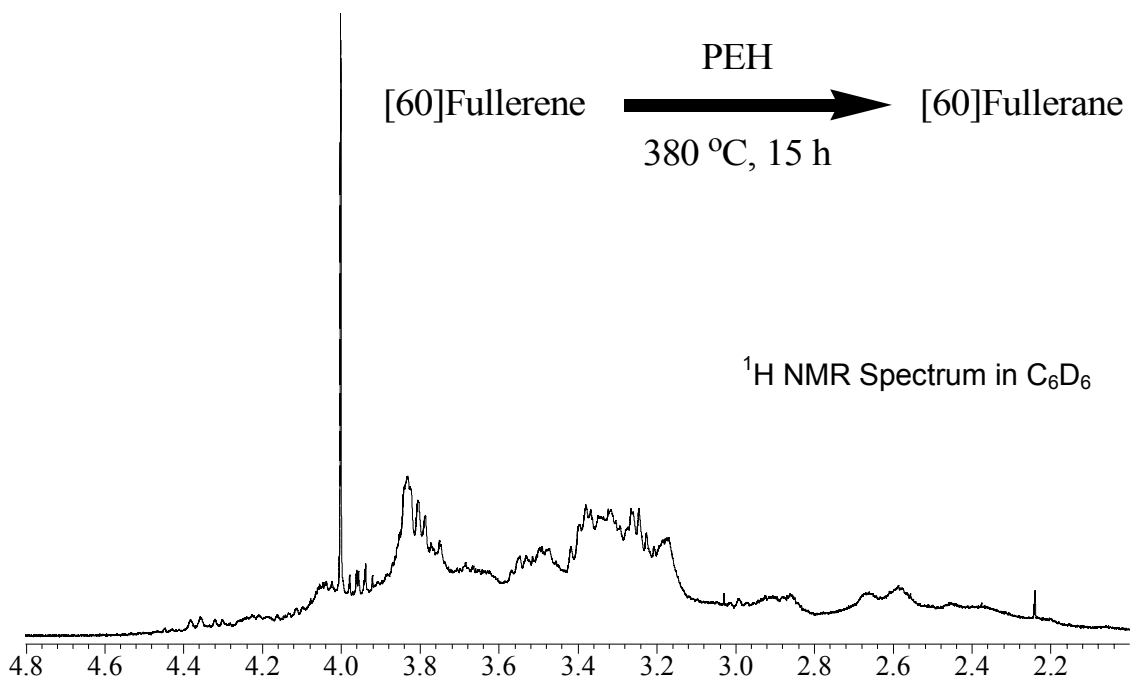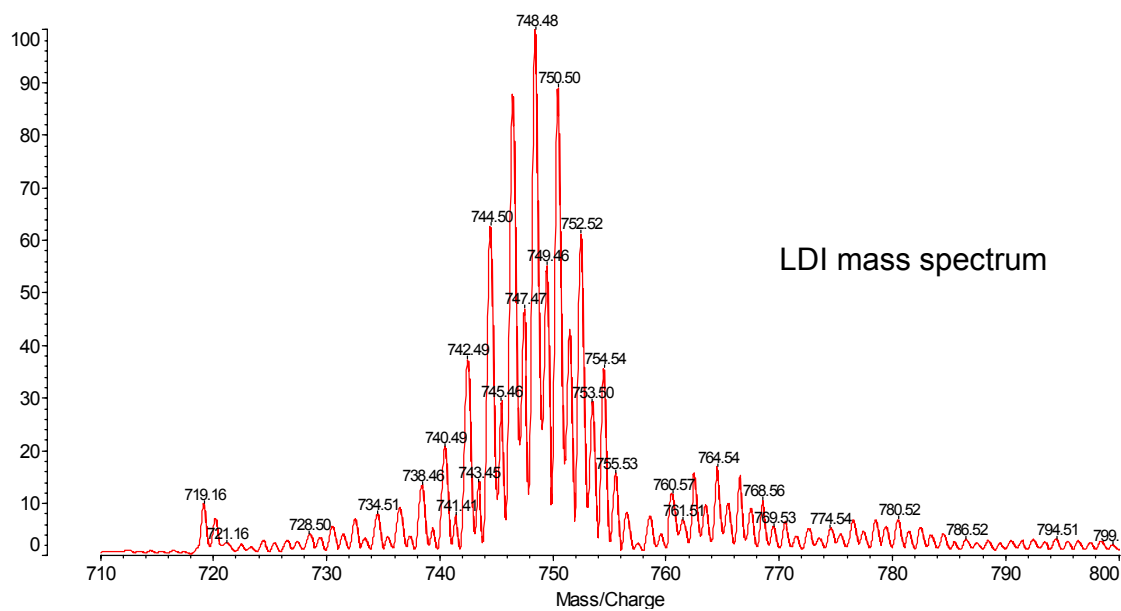

Jeremy Kintigh, Jonathan B. Briggs, Kristine Letourneau, and Glen P. Miller\*  
 Department of Chemistry and Materials Science Program-- University of New Hampshire

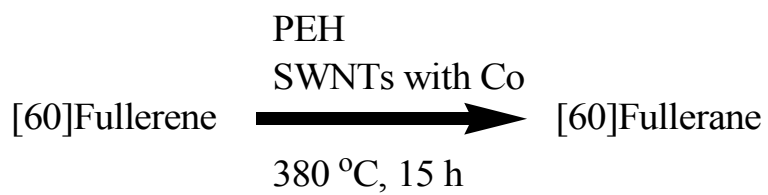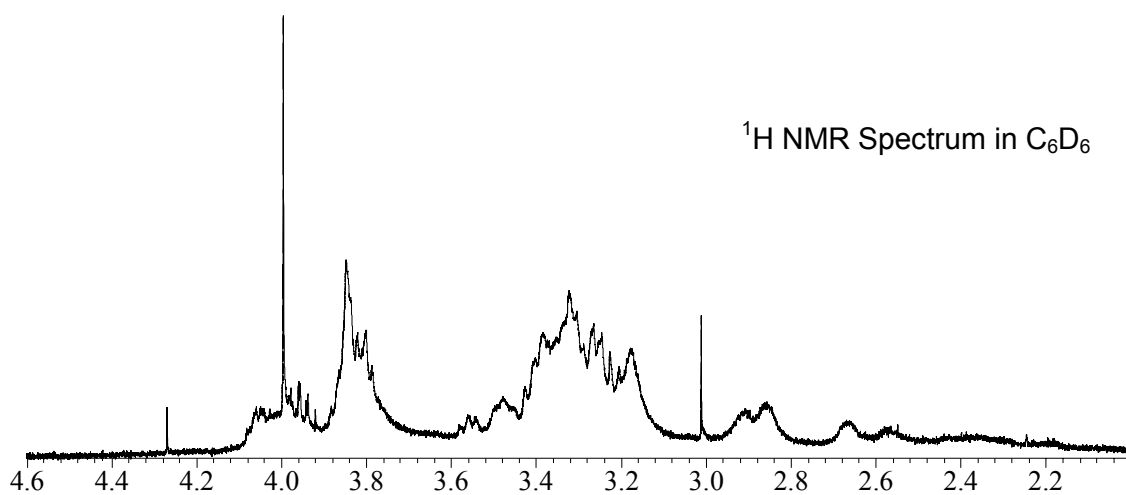

Jeremy Kintigh, Jonathan B. Briggs, Kristine Letourneau, and Glen P. Miller\*  
Department of Chemistry and Materials Science Program-- University of New Hampshire

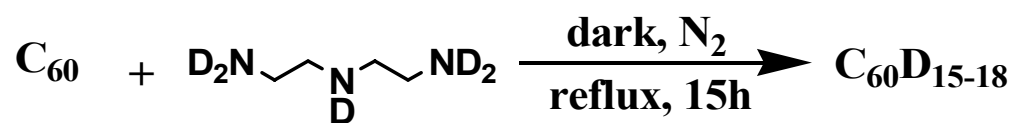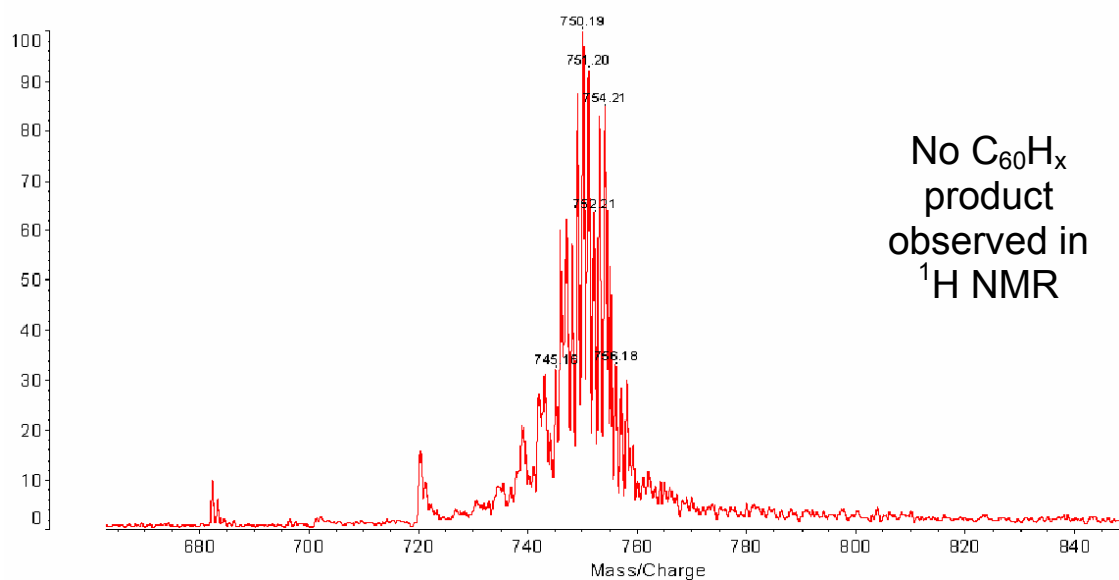

Jeremy Kintigh, Jonathan B. Briggs, Kristine Letourneau, and Glen P. Miller\*  
 Department of Chemistry and Materials Science Program-- University of New Hampshire
